# Supplementary material
Source: PubMed Central journal article supplement (PMC3881546)
Supplement: NIHMS538894-supplement-supplement_1.pdf [file NIHMS538894-supplement-supplement_1.pdf]

**Supplemental Table 1. Genotypes of eleven melanoma cell lines**

| <b>Melanoma Cell Lines (SKMEL)</b> | <b><i>MDM2</i> SNP309</b> | <b>p53 Arg72Pro</b> |
|------------------------------------|---------------------------|---------------------|
| 19                                 | TG                        | PP                  |
| 29                                 | TG                        | PP                  |
| 85                                 | GG                        | RR                  |
| 94                                 | GG                        | RR                  |
| 100                                | GG                        | RR                  |
| 103                                | TT                        | RR                  |
| 147                                | TT                        | RR                  |
| 173                                | TG                        | RR                  |
| 187                                | TG                        | PP                  |
| 192                                | TG                        | RR                  |
| 197                                | TG                        | RR                  |
